# Supplementary material for: The influence of the precursor molar ratio on the structure of the CdS catalyst during synthesis and visible-light driven CO2 reduction into solar fuel
Source: Royal Society of Chemistry journal article supplement (doi:10.1039/d2nj01335e), 2022-01-01
Supplement: d2nj01335e1.pdf [file d2nj01335e1.pdf]

**Electronic Supplementary Material (ESI) for New Journal of  
Chemistry**

**Influences of the precursor molar ratio in synthesis on the structures  
and visible-light driven CO<sub>2</sub> reduction into solar fuel of CdS catalyst**

Cong Huang,<sup>a,b</sup> Xuehua Zhang,<sup>\*b,c</sup> Dongyang Li,<sup>b</sup> Mengyue Wang<sup>b,c</sup> and Qiang Wu<sup>\*a</sup>

<sup>a</sup> Shanghai Key Laboratory of Materials Protection and Advanced Materials in Electric  
Power, Shanghai University of Electric Power, Shanghai, 200090, China

<sup>b</sup> CAS Key Laboratory of Nanosystem and Hierarchical Fabrication, CAS Center for  
Excellence in Nanoscience, National Center for Nanoscience and Technology, Beijing  
100190, China.

<sup>c</sup> University of Chinese Academy of Sciences, Beijing 100049, China

\* Corresponding author. Tel.: +86 10 8254 5657; Fax: +86 10 6265 6765.

\*E-mail address: zhangxh@nanoctr.cn and qiangwu@shiep.edu.cn

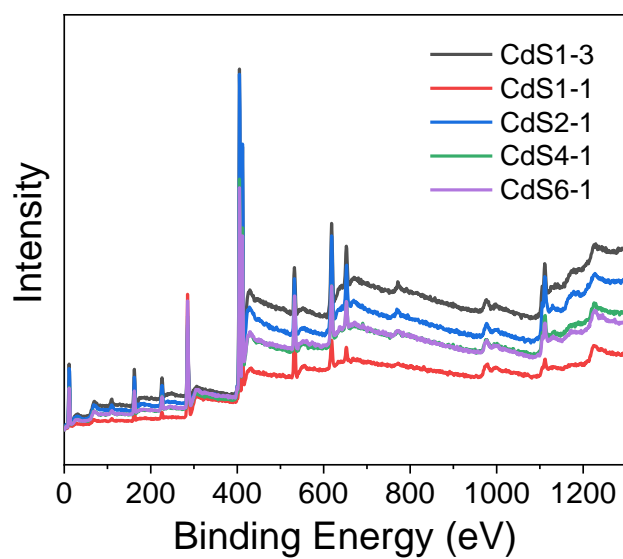

**Figure S1.** XPS survey spectra of the as-synthesized CdS samples.

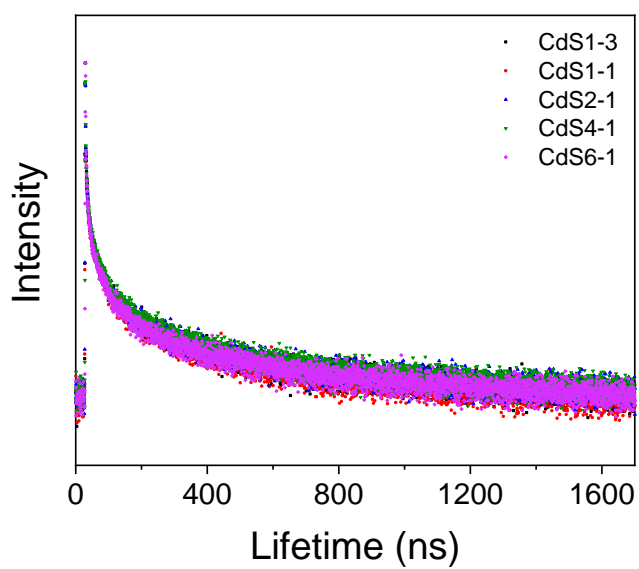

**Figure S2.** Time-resolved PL decay curves of the as-synthesized CdS samples.

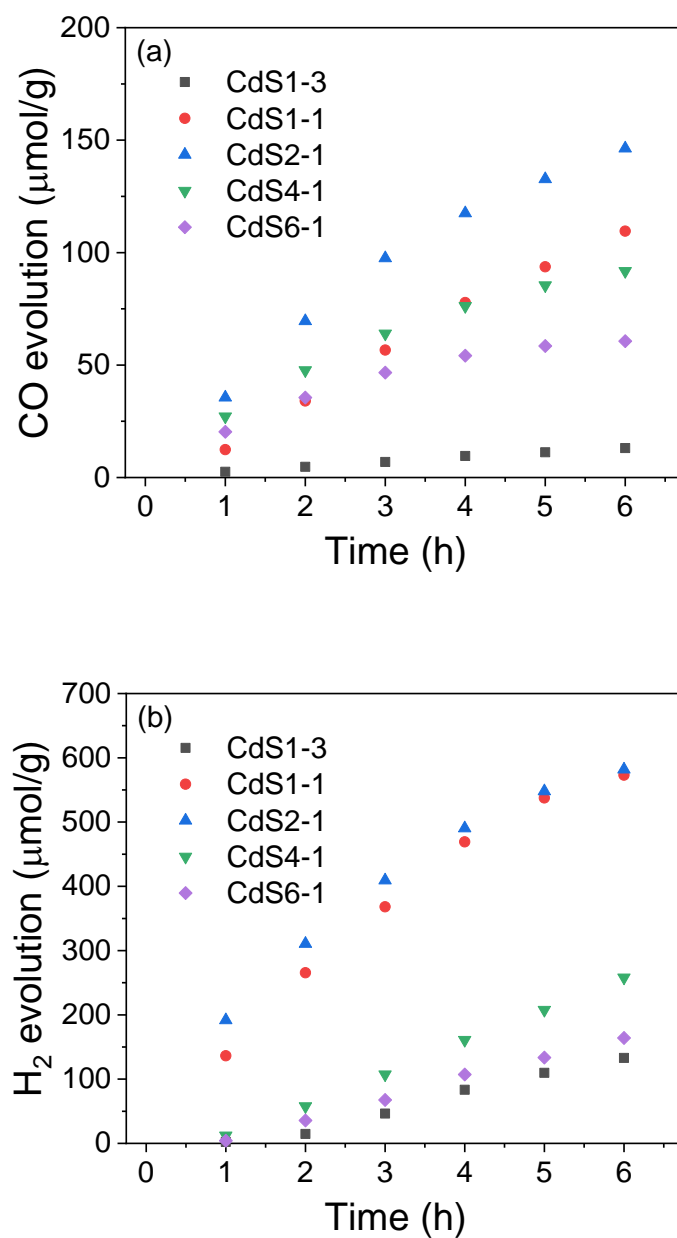

**Figure S3.** Time-dependent gas evolution yield of (a) CO and (b) H<sub>2</sub> for photocatalytic reduction of CO<sub>2</sub> over the as-synthesized CdS catalysts in 6 h in CH<sub>3</sub>CN:H<sub>2</sub>O:TEOA (3:1:1, 100 mL) mixed solution under visible-light irradiation ( $420 \text{ nm} \leq \lambda \leq 780 \text{ nm}$ ).

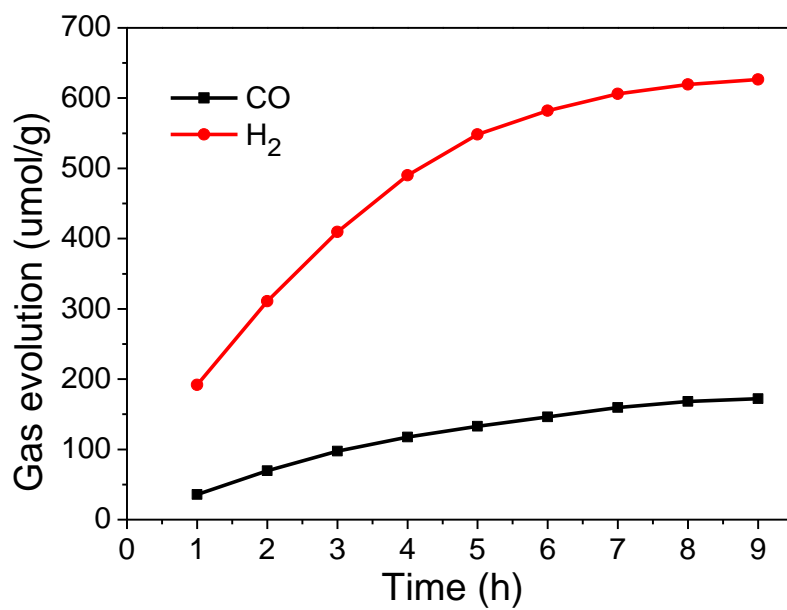

**Figure S4.** Time dependence of CO and H<sub>2</sub> evolution amount using CdS2-1 catalyst in CH<sub>3</sub>CN:H<sub>2</sub>O:TEOA (3:1:1, 100 mL) mixed solution under visible-light illumination for 9 h.
